# Supplementary material
Source: bioRxiv or medRxiv preprint supplement (https://medrxiv.org/highwire/filestream/89854/field_highwire_adjunct_files/0/2020.07.14.20153411-1.pdf)
Supplement: Supplementary file [file 2020.07.14.20153411-1.pdf]

## ARTIGO

### **Análise da associação entre força de preensão manual e funcionalidade em idosos da comunidade**

Analysis of the association between hand grip strength and functionality in community elderly

Título curto em português: Associação entre força de preensão manual e funcionalidade em idosos

Título curto em inglês: Association between hand grip strength and functionality in elderly

**Autores:** Mariana Edinger Wieczorek<sup>1</sup> Cislaine Machado de Souza<sup>1</sup> Patrícia da Silva Klahr<sup>1</sup> Luis Henrique Telles da Rosa<sup>1</sup>

<sup>1</sup>Universidade Federal de Ciências da Saúde de Porto Alegre (UFCSPA), Porto Alegre, RS, Brasil.

#### **Correspondência autor:**

Mariana Edinger Wieczorek

Email: marianawieczorek@gmail.com

## RESUMO

**Objetivo:** Analisar a associação entre força de preensão manual (FPM) e testes de desempenho funcional, por parte de idosos saudáveis, não institucionalizados.

**Método:** Trata-se de uma pesquisa com delineamento transversal. A amostra foi composta por 36 idosos ( $66,69 \pm 4,84$  anos), todos responderam a um instrumento contendo avaliação cognitiva e outro de avaliação do nível de atividade física, além de dados sociodemográficos e condições de saúde. A FPM foi aferida através de dinamômetro hidráulico JAMAR e foram realizados o Teste de caminhada de seis minutos (TC6) e o teste *Timed Up and Go* (TUG) para avaliação da capacidade cardiorrespiratória submáxima durante o deslocamento e a mobilidade corporal.

**Resultados:** Foi possível verificar através do coeficiente de Pearson a associação fraca e significativa entre a FPM e as variáveis do TC6 ( $p \leq 0,05$ ) e TUG ( $p = 0,027$ ).

**Conclusão:** Para a amostra de idosos saudáveis e nas condições experimentais propostas, a FPM relacionou-se aos testes de desempenho. Sendo assim acredita-se que a avaliação da FPM pode ser uma alternativa para inferência da funcionalidade nesta população.

**Palavras-chave:** Idoso. Força muscular. Dinamômetro de força muscular. Desempenho físico funcional. Teste de caminhada.

## ABSTRACT

Objective: To analyze an association between handgrip strength (HGS) and functional performance tests by healthy, non-institutionalized elderly. Method: This is a cross-sectional study. A sample consisted of 36 elderly people ( $66.69 \pm 4.84$  years), all of whom responded to a cognitive assessment instrument and another to assess the level of physical activity, in addition to sociodemographic data and health conditions. The HGS was measured using the hydraulic dynamometer JAMAR and performed the six-minute walk test (6MWT) and the Timed Up and Go test (TUG) to assess the cardiorespiratory capacity submitted during displacement and body mobility. Results: It was possible to verify through the Pearson coefficient the weak and significant association between the MPH and the variables 6MWT ( $p \leq 0.05$ ) and TUG ( $p = 0.027$ ). Conclusion: For samples of healthy elderly and applied experimental conditions, the FPM is related to performance tests. Thus, it is believed that the evaluation of the HGS may be an alternative to interference in this population.

**Keywords:** Aged. Muscle strength. Muscle strength dynamometer. Physical functional performance. Walk test.

## SUMÁRIO

|                                               |    |
|-----------------------------------------------|----|
| RESUMO.....                                   | 1  |
| ABSTRACT .....                                | 2  |
| INTRODUÇÃO .....                              | 4  |
| METODOLOGIA.....                              | 5  |
| Coleta de dados .....                         | 6  |
| Força de preensão manual (FPM).....           | 6  |
| Teste de Caminhada de Seis Minutos (TC6)..... | 7  |
| Teste <i>Timed Up and Go</i> (TUG) .....      | 7  |
| Análise estatística .....                     | 7  |
| RESULTADOS .....                              | 8  |
| Tabela 1.....                                 | 8  |
| Tabela 2.....                                 | 9  |
| Tabela 3.....                                 | 9  |
| Tabela 4.....                                 | 10 |
| DISCUSSÃO .....                               | 10 |
| CONCLUSÃO.....                                | 13 |
| REFERÊNCIAS.....                              | 14 |

## INTRODUÇÃO

O processo de envelhecimento é naturalmente acompanhado por diversas alterações multifatoriais e progressivas. Dentre estas, destacam-se não só transformações fisiológicas e metabólicas, mas também estruturais e funcionais. Os declínios decorrentes do processo de envelhecimento, bem como as disfunções e doenças prevalentes nessa faixa etária, podem comprometer a funcionalidade, independência e qualidade de vida do idoso.<sup>1-4</sup>

A perda da massa muscular e conseqüentemente da força e potência muscular é a principal responsável pela deterioração na mobilidade e na funcionalidade do indivíduo que está envelhecendo.<sup>2-4</sup> Os idosos apresentam decréscimo da força muscular oriundo de mecanismos musculares, neurológicos, endócrinos ou ambientais.<sup>2,5</sup> O declínio da força e mobilidade do idoso, interfere na realização de atividades essenciais para o desempenho funcional, como caminhar, sentar, levantar, subir escadas, entre outros.<sup>1,4</sup>

Como indicador geral de força e potência muscular, na prática clínica, a Força de Prensão Manual (FPM) vem sendo empregada.<sup>6</sup> Além disso, a avaliação da FPM é utilizada como indicador de força global<sup>8,9</sup> e funcionalidade<sup>7,8</sup>, entretanto, nem todos os estudos foram capazes de demonstrar a existência de correlações significativas entre a FPM e o desempenho funcional.<sup>10</sup> Existem diversas formas de avaliar o estado funcional e o nível de aptidão física de idosos, muitas vezes por inferência, pois sabe-se que quanto pior o estado de saúde, maior o impacto negativo na mobilidade, na capacidade de realizar uma tarefa submáxima e na independência do idoso.<sup>13,14</sup>

Habitualmente para execução de testes funcionais são recrutados grupos musculares essenciais para o suporte de peso corporal, como músculos estabilizadores de tronco e de membros inferiores<sup>10,11,12</sup>, o desempenho se deve à capacidade de gerar força em um tempo determinado de teste (fibras de contração lenta, tipo I), enquanto a FPM avalia o pico de força muscular de grupamentos superiores, (fibras de contração rápida - tipo II), mais resistentes à fadiga.<sup>11,12</sup>

Em geral, os testes de desempenho funcional envolvem tarefas que exigem transferência postural, mobilidade e deslocamento.<sup>12,13</sup> O teste de caminhada de seis minutos (TC6) mede a distância máxima percorrida no período de 6 minutos,

sendo comumente utilizado para avaliação da capacidade cardiorrespiratória submáxima durante a realização de atividades que exigem deslocamentos.<sup>13,14</sup> Já o teste *Timed Up and Go* (TUG) indica a mobilidade funcional, cujo desempenho está relacionado com a marcha, as trocas posturais e de direção durante o ato de caminhar, sendo avaliado através do tempo dispendido na realização do percurso.<sup>12,13</sup>

Ainda existem lacunas quanto às relações entre a FPM e a funcionalidade de idosos.<sup>10</sup> Sendo questionável a reprodutibilidade da FPM como indicador de desempenho funcional em pessoas acima de 60 anos. Este estudo teve como objetivo verificar a associação entre FPM, a capacidade cardiorrespiratória submáxima durante o deslocamento e a mobilidade corporal em idosos saudáveis, não institucionalizados.

## **METODOLOGIA**

Trata-se de um estudo observacional com delineamento transversal, aprovado pelo Comitê de Ética em Pesquisa da Universidade Federal de Ciências da Saúde de Porto Alegre pelo número de protocolo 2.137.840/2017. Este estudo integra uma pesquisa maior sobre a temática da funcionalidade em idosos, desenvolvida na instituição pelo Grupo de estudos em Reabilitação (GEReab).

Os sujeitos foram recrutados por meio de mídias sociais e ações de divulgação local com panfletos e cartazes. Foram incluídos idosos com idade igual ou superior a 60 anos, residentes na cidade de Porto Alegre, RS, Brasil. Para critérios de inclusão, foram considerados idosos saudáveis, aqueles que apresentavam autonomia e independência e controle de doenças crônicas e sintomas físicos.<sup>15,16</sup> Foram excluídos, os idosos em pós-operatório de qualquer natureza, portadores de doenças ou déficits físico e mentais que caracterizassem um processo de envelhecimento patológico e que impedissem a realização dos testes.

As variáveis sociodemográficas e clínicas de interesse foram: sexo, idade, peso e altura, índice de massa corporal, escolaridade, problemas de saúde, uso de medicamentos, atividades ocupacionais, sociais e exercício físico. Foi aplicado o Miniexame de Estado Mental (MEEM)<sup>17</sup> para o conhecimento cognitivo dos idosos,

sendo utilizados os seguintes pontos de corte: 18 pontos para analfabetos, 21 para aqueles com escolaridade entre um e três anos, 24 para indivíduos entre quatro e sete anos de educação formal, e 26 para pessoas com mais de sete anos de escolaridade. Para avaliação do nível de atividade física foi aplicado o International Physical Activity Questionnaire (IPAQ)<sup>18</sup>, forma curta. Essa versão apresenta sete questões, cujas informações estimam o tempo despendido por semana em diferentes domínios de atividade física, como trabalho, meio de transporte, atividades domésticas; de recreação, esporte ou lazer, e o tempo gasto sentado.<sup>19</sup> A classificação final determina como sedentários, irregularmente ativos, ativos e muito ativos.<sup>20</sup>

### **Coleta de dados**

Para assegurar a qualidade do protocolo de avaliação, os pesquisadores responsáveis pela coleta de dados foram devidamente capacitados. Tanto a entrevista inicial, quanto o protocolo de aplicação dos testes para os indivíduos incluídos na pesquisa, ocorreram no Laboratório de Fisioterapia da Universidade Federal de Ciências da Saúde de Porto Alegre, no período de janeiro de 2018 a julho de 2019. A avaliação da força de preensão manual e dos testes funcionais foram aplicados no mesmo dia. Os sujeitos participantes da pesquisa foram informados sobre os procedimentos e assinaram o Termo de Consentimento Livre e Esclarecido (TCLE).

### **Força de preensão manual (FPM)**

Para a aferição da força de preensão manual, foi utilizado um dinamômetro hidráulico portátil da marca JAMAR.<sup>21</sup> A medida foi verificada com o indivíduo sentado em uma cadeira com encosto e sem apoio para os braços. O ombro do membro testado ficou aduzido e em rotação neutra, cotovelo em flexão de 90 graus, antebraço na posição neutra e punho entre 0 e 30 graus de extensão e entre 0 a 15 graus de desvio ulnar.<sup>6,21,22</sup> Foi realizada uma demonstração de como o teste deveria ser executado para a familiarização com o equipamento e os participantes fizeram uma simulação. Durante a realização do teste houve encorajamento através de comando verbal padronizado. Os participantes foram instruídos a fazer contração máxima, utilizando a mão dominante.<sup>6,22</sup> Foram coletadas três medidas, assumindo o melhor desempenho dentre as três tentativas como referência<sup>6,22</sup>, houve um

intervalo de repouso de 30 segundos entre cada teste.<sup>21,22</sup> Alguns fatores podem dificultar o estabelecimento de valores normativos de FPM, entre eles podem ser citados: sexo, idade, dominância, horário de avaliação, posicionamento corporal e características antropométricas.<sup>6,21,22</sup>

### **Teste de Caminhada de Seis Minutos (TC6)**

O TC6 foi aplicado conforme preconizado pela American Thoracic Society<sup>23</sup>, resumidamente os sujeitos foram instruídos a andar de um lado para outro em um corredor de 30 metros, durante um período de 6 minutos, sendo orientados a andar o mais rápido possível, sem correr. Antes do início do teste, foram aferidos a pressão arterial (PA), saturação periférica de oxigênio (SpO<sub>2</sub>), escala de Borg, frequência cardíaca (FC) e a frequência respiratória (FR). As variáveis foram coletadas novamente após o término do teste. O avaliador caminhou durante todo o teste um pouco atrás do indivíduo, o qual era monitorado durante todo o período pelo oxímetro. Durante o teste, todos os participantes foram encorajados verbalmente de forma preestabelecida, a cada minuto transcorrido. Quem se sentisse cansado, poderia diminuir o ritmo da caminhada ou até mesmo parar se necessário, sendo que o cronômetro não era parado durante o descanso. Após 6 min, o sujeito foi instruído a parar e a distância percorrida na última volta foi medida.

### **Teste *Timed Up and Go* (TUG)**

Foi posicionada uma cadeira com encosto e solicitado ao idoso, que levantasse da cadeira, sem apoio das mãos, percorresse uma distância de 3 metros, desse a volta e retornasse sentando novamente na cadeira. Durante o trajeto o cronômetro foi iniciado quando o idoso levantou da cadeira, e interrompido quando suas costas retomaram o apoio no encosto da cadeira. O tempo do TUG foi medido em segundos (s). Um ensaio prático foi realizado com cada participante para se familiarizar com a tarefa.<sup>24</sup>

### **Análise estatística**

Os dados numéricos paramétricos foram expressos em média e desvio padrão. Inicialmente, foi realizado o teste de Shapiro-Wilk para verificar a normalidade dos dados. As descrições das variáveis qualitativas foram expressas em frequência absoluta e relativa. Foi utilizado o Coeficiente de correlação de

Pearson para verificar a correlação entre a FPM e os testes de desempenho funcional TC6 e TUG. Para a comparação das demais variáveis entre os testes, foi utilizado o teste t de Student para amostras dependentes. O nível de significância adotado foi de ( $p \leq 0,05$ ).

## RESULTADOS

Na Tabela 1 estão apresentadas as características da amostra estudada. Todos os participantes da pesquisa declararam ser aposentados ou pensionistas, destes, 58,33% relataram ter outra ocupação e 8,33% um trabalho informal. Os 72,22% de idosos que participavam de atividades sociais relataram na sua maioria, compromissos religiosos e participação em grupos de artesanato. Segundo a classificação do questionário IPAQ, o idoso identificado como irregularmente ativo A, deveria atingir pelo menos a frequência de 5 dias semanais ou a duração de 150 minutos por semana, já o irregularmente ativo B não atingiu nenhum dos critérios quanto à frequência e duração.<sup>20</sup>

**Tabela 1.** Caracterização da amostra de idosos saudáveis (N=36). Porto Alegre, RS, 2019.

| <b>Variáveis quantitativas</b> | <b>Média e DP±</b> |
|--------------------------------|--------------------|
| Idade (anos)                   | 66,69 (± 4,84)     |
| Estatura (m)                   | 1,6 (± 0,08)       |
| Peso (Kg)                      | 76,85 (± 14,4)     |
| IMC (Kg/m <sup>2</sup> )       | 29,9 (± 5,26)      |
| Anos de estudo                 | 15,21 (± 3,7)      |
| MEEM                           | 24 (± 9)           |
| <b>Variáveis qualitativas</b>  | <b>n (%)</b>       |
| Sexo                           |                    |
| Feminino                       | 30 (83,33)         |
| Masculino                      | 6 (16,67)          |
| Atividades                     |                    |
| Ocupação                       | 21 (58,33)         |
| Trabalho formal                | 3 (8,33)           |
| Atividades sociais             | 26 (72,22)         |
| Atividades de lazer            | 9 (25,00)          |
| Exercício físico               |                    |
| Realiza caminhadas             | 7 (19,44)          |
| Realiza musculação             | 1 (2,78)           |
| Classificação IPAQ             |                    |
| Muito ativo                    | 2 (5,55)           |

|                        |            |
|------------------------|------------|
| Ativo                  | 3 (8,33)   |
| Irregularmente ativo A | 10 (27,78) |
| Irregularmente ativo B | 17 (47,22) |
| Sedentário             | 4 (11,11)  |

**Legenda:** Várias quantitativas foram expressas em Média= média aritmética e DP= desvio padrão. Variáveis qualitativas expressas em n= frequência absoluta e %= frequência relativa. IMC= Índice de Massa Corporal; MEEM = Miniexame de Estado Mental; IPAQ= International Physical Activity Questionnaire.

Os resultados referentes aos testes aplicados são apresentados na Tabela 2. Todos os idosos participantes conseguiram completar os testes de desempenho funcional sem interrupções. A Tabela 3 mostra as variáveis analisadas no TC6, pré e pós teste, os valores demonstram que houve resposta adequada ao exercício.

**Tabela 2.** Resultados da Força de Preensão Manual e testes de desempenho funcional. Porto Alegre, RS, 2019.

| Testes    | Média e DP±      |
|-----------|------------------|
| FPM (kgf) | 30,22 (± 8,36)   |
| TC6 (m)   | 455,17 (± 90,41) |
| TUG (s)   | 6,89 (± 1,6)     |

**Legenda:** FPM= força de preensão manual; TC6= teste de caminhada de 6 minutos; TUG= *Timed Up and Go*.

**Tabela 3.** Variáveis do Teste de caminhada de 6 minutos nos momentos pré e pós teste. Porto Alegre, RS, 2019.

| Variáveis  | Pré-teste<br>Média e DP± | Pós-teste<br>Média e DP± | p     |
|------------|--------------------------|--------------------------|-------|
| SpO2 (%)   | 97 (± 1,84)              | 97,68 (± 1,20)           | 0,010 |
| FC (bpm)   | 77,15 (± 10,68)          | 82,5 (± 10,62)           | 0,004 |
| PAS (mmHg) | 131,88 (± 16,71)         | 140,35 (± 19,79)         | 0,003 |
| PAD (mmHg) | 77,5 (± 9,77)            | 82,18 (± 10,01)          | 0,003 |
| FR (irpm)  | 17,5 (± 2,69)            | 20,56 (± 3,26)           | 0,000 |

**Legenda:** SpO2= Saturação de oxigênio; FC= frequência cardíaca; PAS= pressão arterial sistólica; PAD= pressão arterial diastólica; FR= frequência respiratória; p= nível de significância.

A Tabela 4 mostra a correlação entre a FPM e os resultados do TC6 (distância percorrida em metros) e no TUG (tempo do deslocamento em segundos). Os resultados através do coeficiente de Pearson revelaram a existência de

correlação fraca, porém significativa entre a FPM e a funcionalidade, medida através dos testes de desempenho funcional.

**Tabela 4.** Correlação entre força de preensão manual e os testes de desempenho funcional. Porto Alegre, RS, 2019.

| Teste de Correlação de Pearson | Força de Preensão Manual |       |
|--------------------------------|--------------------------|-------|
|                                | r                        | p     |
| TC6                            | 0,324                    | 0,05  |
| TUG                            | -0,385                   | 0,027 |

**Legenda:** TC6= Teste de caminhada de 6 minutos; TUG= *Timed Up and Go*; r = Correlação de Pearson; p = nível de significância.

## DISCUSSÃO

O objetivo do estudo foi analisar a correlação entre FPM e os testes de desempenho funcional, por parte de idosos saudáveis, para tanto, utilizou-se o coeficiente de correlação de Pearson. O estudo demonstrou a associação fraca e estatisticamente significativa entre a FPM e as variáveis referentes aos testes de desempenho funcional, sendo verificado que, quanto maior o número de metros percorridos no TC6 e menor o tempo de realização no TUG, maior a FPM.

Em relação às características da amostra, houve um predomínio de idosos do sexo feminino 30 (83,33%), confirmando o padrão demográfico brasileiro, no qual, o número absoluto de mulheres idosas é maior que homens.<sup>25</sup> Apenas 3 (8,33%) dos idosos foram classificados como ativos fisicamente e 2 (5,55%) como muitos ativos; e a média do Índice de Massa Corporal (IMC) foi de 29,9 Kg/m<sup>2</sup> ( $\pm$  5,26). Segundo Lenardt et al.<sup>26</sup>, homens e mulheres idosos com menor nível de atividade física têm também menor massa muscular e conseqüentemente maior prevalência de incapacidade física.

Colaborando nessa lógica, Martin et al.<sup>27</sup> discutem que a inatividade física pode contribuir para a perda funcional dos idosos, devido a alteração fisiológica de massa muscular e força, diminuindo a aptidão e desempenho físico. Neste estudo foi classificado como sobrepeso idosos com IMC entre 28 e 30kg/m<sup>2</sup>. O estudo de Furtado et al.<sup>28</sup> ao analisar os valores do IMC e da FPM, revelou que nesta faixa

etária, o aumento do IMC pode estar relacionado com a diminuição da força em ambos os gêneros. Contudo, neste estudo com idosos saudáveis, comparando com pontos de corte já estabelecidos na literatura, a média de valores de FPM e dos testes de desempenho foram consideradas relativamente altas para esta população.

Isso se deve provavelmente ao fato da maioria dos estudos que avaliaram essas variáveis, em geral, incluírem idosos frágeis, portadores de alguma comorbidade ou institucionalizados. Um número expressivo de idosos do estudo, 26 (72,22%), participavam de atividades sociais e 21 (58,33%) realizavam alguma ocupação, o que pode prever indiretamente uma maior capacidade física, aumentando assim a FPM e desempenho nos testes. A realização de atividade física de maneira sistemática contribui positivamente para maiores níveis de FPM<sup>27,29</sup> e aptidão física<sup>26</sup>, contudo um comportamento ativo em outros domínios e atividades, mesmo que não estruturado, mas realizado espontaneamente ao longo do dia, sobretudo no lazer<sup>29</sup>, pode influenciar positivamente do mesmo modo<sup>30</sup>.

No presente estudo, a média da FPM foi 30,22 Kgf ( $\pm$  8,36). Baseado na última revisão do consenso europeu sobre definição e diagnóstico de sarcopenia, o European Working Group on Sarcopenia in Older Persons (EWGSOP)<sup>31</sup> redefiniu através de resultados de FPM, os pontos de corte relacionados a sarcopenia (<27kg para homens e <16kg para mulheres), com base nesse estudo, os idosos da amostra não apresentavam quadro de sarcopenia. Segundo Lenardt et al.<sup>32</sup> os pontos de corte se mostram importantes para predizer incapacidade, morbidade e mortalidade, principalmente, associada à fragilidade em idosos.

Considerando os resultados em relação aos valores dos testes de desempenho funcional, para o TC6 foi encontrado a medida de distância de 455,17m ( $\pm$  90,41). Segundo Britto e Sousa<sup>33</sup> existem, na literatura, algumas fórmulas que podem predizer, com base em sexo, peso, altura e idade, qual a distância caminhada esperada durante o TC6, mas presume-se que pessoas saudáveis possam caminhar durante o teste, distâncias variando entre 400 e 700 metros; em indivíduos não saudáveis, a distância caminhada durante o teste, inferior a 300 metros pode estar correlacionada com alta probabilidade de óbito e/ou hospitalização.

Com relação ao TUG, a medida em tempo encontrada no estudo foi de 6,89s ( $\pm 1,6$ ). No estudo de Rodrigues et al.<sup>34</sup>, foi apontada a classificação de um tempo de até 10 segundos sendo considerado normal, de 10,01 a 20 segundos representando desempenho comprometido e acima de 20,01 segundos um maior risco de quedas em idosos, outra medida de TUG também foi sugerida, levando em conta a estratificação por idade. Para Zazá et al.<sup>35</sup> foi verificado que o desempenho de idosos consideradas saudáveis e fisicamente ativas não difere dos valores de referência sugeridos para o teste TUG.

Analisando os resultados do presente estudo podemos verificar que a medida de FPM pode ser associada ao desempenho funcional de idosos saudáveis e não institucionalizados. Outros estudos já demonstraram associações positivas entre FPM e tarefas funcionais. No estudo de Geraldine et al.<sup>10</sup> foi encontrada correlação moderada entre a FPM e o desempenho em tarefas motoras. Tal associação revelou-se mais forte com o conjunto dos testes do que com cada um deles tomado isoladamente. Esse resultado se deve ao fato provavelmente do estudo conter também testes de função com habilidades motoras finas, como tirar e colocar a chave em uma fechadura e tirar e recolocar uma lâmpada em um bocal, por exemplo.

Da mesma forma no estudo de Oliveira et al.<sup>7</sup> foi constatado que a FPM serve como indicador de funcionalidade, relacionados à AVD,s e AIVD,s. Os resultados se deram através da aplicação do Índice de Barthel e da Escala de Lawton, que classificam as atividades realizadas pelos idosos por pontuação. Muitas das atividades motoras presentes nas escalas, como alimentação, locomoção, higiene pessoal, administração de funções sociais, econômicas e de autocuidado, eram verificadas através das respostas.

A exploração de uma ferramenta de fácil e rápida aplicabilidade por profissionais da saúde, para avaliação da funcionalidade do idoso se mostra relevante. Contudo, não foram encontrados estudos semelhantes, incluindo a mesma amostragem de idosos saudáveis e correlacionando com as mesmas variáveis pesquisadas. Este estudo primou pelo rigor metodológico, qualidade de descrição e aplicação dos testes, bem como critérios de seleção e inclusão na pesquisa e coleta de informações para caracterização da amostra. Entretanto, duas possíveis limitações devem ser consideradas. A primeira refere-se ao tamanho e

tipo da amostra. O pequeno número de sujeitos e o fato das mulheres corresponderem a quase totalidade da amostra, limita a validade externa dos achados. Desta forma, considerando as limitações apresentadas, existem perspectivas futuras de realização de um estudo de maior amostragem, com distribuição mais homogênea e estratificada por sexo.

## **CONCLUSÃO**

Para a amostra de idosos saudáveis e nas condições experimentais propostas, foi verificada associação entre a FPM, a capacidade cardiorrespiratória submáxima e a mobilidade corporal. Considerando a alta correlação entre estes aspectos e a funcionalidade, é possível inferir que a FPM pode ser um indicador relevante da capacidade funcional nesta população.

**APOIO FINANCEIRO:** Não houve financiamento.

**CONFLITO DE INTERESSES:** Não existiram conflitos de interesse relacionados ao estudo.

## REFERÊNCIAS

1. Vieira MCA, Souza CF, Câmara SMA, Matos GSR, Moreira MA, Maciel ACC. Relação entre força de preensão manual e força de membro inferior em mulheres de meia idade: um estudo transversal. *Rev Bras Ativ Fis Saúde* 2015;20(5):467-475.
2. Araújo MLM, Fló CM, Muchale SM. Efeitos dos exercícios resistidos sobre o equilíbrio e a funcionalidade de idosos saudáveis: artigo de atualização. *Fisioter Pesqui* 2010;17(3):277-83.
3. Mazo GZ, Liposcki DB, Ananda C, Prevê D. Condições de saúde, incidência de quedas e nível de atividade física dos idosos. *Rev bras fisioter* 2007;11(6):437-442.
4. Mendonça CS, Moura SKMSF, Lopes DT. Benefícios do treinamento de força para idosos: revisão bibliográfica. *Rev Campo Saber* 2018;4(1):74-87.
5. Martinez BP, Camelier FWR, Camelier AA. Sarcopenia em idosos: um estudo de revisão. *Revista Pesquisa em Fisioterapia* 2014;4(1):62-70.
6. Dias JA, Ovando AC, Kulkamp W, Junior NGB. Força de preensão palmar: métodos de avaliação e fatores que influenciam a medida. *Rev Bras Cineantropom Desempenho Hum* 2010;12(3):209-216.
7. Oliveira EN, Santos KT, Reis LA. Força de preensão manual como indicador de funcionalidade em idosos. *Revista Pesquisa em Fisioterapia* 2017;7(3):384-392.
8. Mattioli RA, Cavalli AS, Ribeiro JAB, Silva MC. Associação entre força de preensão manual e atividade física em idosos hipertensos. *Rev Bras Geriatr Gerontol* 2015;18(4):881-891.
9. Santos LB, Vilela ABA, Santos CA, Lessa RS, Rocha SV. Sensibilidade e especificidade da força de preensão manual como discriminador de risco para multimorbidades em idosos. *Cad Saúde Colet* 2018;26(2):146-152.
10. Geraldles AAR, Oliveira ARM, Albuquerque RB, Carvalho JM, Farinatti PTV. A Força de Preensão Manual é Boa Preditora Do Desempenho Funcional de Idosos Frágeis: um Estudo Correlacional Múltiplo. *Rev Bras Med Esporte* 2008;14(1):12-6.
11. Santos PHG, Pereira JE, Soares WN, Colato H. Potência muscular e sua relação com a autonomia funcional de idosos participante de programas sociais de um município da Amazônia Legal. *Revista Brasileira de Prescrição e Fisiologia do Exercício* 2018;12(75):488-495.

12. Wamsera EL, Valderramas SR, Paula JA, Schieferdecker MEM, Amarante TP, Pinotti F, et al. Melhor desempenho no teste timed up and go está associado a melhor desempenho funcional em idosas da comunidade. *Geriatr Gerontol Aging* 2015;9(4):138-43.
13. Pedrosa R, Holanda G. Correlação entre os testes da caminhada, marcha estacionária e TUG em hipertensas idosas. *Rev Bras Fisioter* 2009;13(3):252-6.
14. Andrade TM, Alves ELM, Figueiredo MLF, Batista MEM, Alves CMS. Avaliação da capacidade funcional de idosos por meio do teste de caminhada de seis minutos. *Rev Pesqui Cuid Fundam* 2015;7(1):2042-2050.
15. Valer DB, Bierhals CCBK, Aires M, Paskulin LMG. O significado de envelhecimento saudável para pessoas idosas vinculadas a grupos educativos. *Rev Bras Geriatr Gerontol* 2015;18(4):809-819.
16. Ciosak SI, Braz E, Costa MFBNA, Nakano NGR, Rodrigues J, Alencar RA, et al. Senescência e senilidade: novo paradigma na Atenção Básica de Saúde. *Rev Esc Enferm USP* 2011;45(2):1763-8.
17. Melo DM, Barbosa AJG. O uso do Mini-Exame do Estado Mental em pesquisas com idosos no Brasil: uma revisão sistemática. *Cien Saude Colet* 2015;20(12):3865-76.
18. Matsudo S, Araujo T, Matsudo V, Andrade D, Andrade E, Oliveira LC, et al. Questionário internacional de atividade física (IPAQ): Estudo de validade e reprodutibilidade no Brasil. *Rev Bras Ativ Fis Saúde* 2001;6(2):5-18.
19. Vespasiano BS, Dias R, Correa DA. A utilização do Questionário Internacional de Atividade Física (IPAQ) como ferramenta diagnóstica do nível de aptidão física: uma revisão no Brasil. *Saúde Rev* 2012,12(32):49-54.
20. Kolchraiber FC, Rocha JS, César DJ, Monteiro OO, Frederico GA, Gamba MA. Nível de atividade física em pessoas com diabetes mellitus tipo 2. *Rev Cuid* 2018;9(2):2105-16.
21. Reis MM, Arantes PMM. Medida da força de preensão manual - validade e confiabilidade do dinamômetro saehan. *Fisioterapia e Pesquisa* 2011;18(2):176-81.
22. Figueiredo IM, Sampaio RF, Mancini MC, Silva FCM, Souza MAP. Teste de força de preensão utilizando o dinamômetro Jamar. *Acta Fisiatr* 2007;14(2):104-110.

23. ATS Committee on Proficiency Standards for Clinical Pulmonary Function Laboratories. ATS statement: guidelines for the six-minute walk test. *Am J Respir Crit Care Med* 2002;166:111-17.
24. Bennell K, Dobson F, Hinman R. Measures of physical performance assessments. *Arthritis Rheumatol* 2011;63(11):S350–S370.
25. Sousa NFS, Lima MG, Cesar CLG, Barros MBA. Envelhecimento ativo: prevalência e diferenças de gênero e idade em estudo de base populacional. *Cad Saúde Pública* 2018;34(11):e00173317.
26. Lenardt MH, Binotto MA, Carneiro NHK, Cechinel C, Betiolli SE, Lourenço TM. Força de preensão manual e atividade física em idosos fragilizados. *Rev Esc Enferm* 2016;50(1):88-94.
27. Martin FG, Nebuloni CC, Najas MS. Correlação entre estado nutricional e força de preensão palmar em idosos. *Rev Bras Geriatr Gerontol* 2012;15(3):493-504.
28. Furtado GE, Santos SS, Rocha SV, Souza NR, Santos CA, Viana HPS, et al. Associações entre estado nutricional e a força de preensão manual em idosos residentes em áreas rurais. *Rev Motri* 2016; 12(1):22-29.
29. Lima TR, Silva DAS, Kovalski DF, González-Chica DA. Associação da força muscular com fatores sociodemográficos e estilo de vida em adultos e idosos jovens no Sul do Brasil. *Cien Saude Colet* 2018; 23(11):3811-20.
30. Maciel MG. Atividade física e funcionalidade do idoso. *Motriz Rev Ed Fis* 2010; 16(4):1024-1032.
31. Cruz-Jentoft AJ, Bahat G, Bauer J, Boirie Y, Bruyère O, Cederholm T, et al. Writing Group for the European Working Group on Sarcopenia in Older People 2 (EWGSOP2). Sarcopenia: revised European consensus on definition and diagnosis. *Age and Ageing* 2018;0:1-16.
32. Lenardt MH, Carneiro NHK, Betiolli SE, Binotto MA, Ribeiro DKMN, Teixeira FFR. Fatores associados à força de preensão manual diminuída em idosos. *Esc Anna Nery Rev Enferm* 2016;20(4):e0082.
33. Britto RR, Sousa LAP. Teste de caminhada de seis minutos uma normatização brasileira. *Fisioter Mov* 2006;19(4):49-54.

34. Rodrigues RAS, Teodózio MM, Espinosa MM, Fett WCR, Melo CD, Fett CA. Timed up and go test and self-perceived health in elderly: population-based study. Rev Bras Cineantropom Desempenho Hum 2018,20(3):247-257.
35. Zazá DC, Vieira GCV, Oliveira PFA. Comparação do desempenho de idosos no teste Timed up and go com valores normativos de referência. Coleç Pesqui Educ Fís 2017,16(4):43-50.
